# Supplementary material for: Streptolysin O and its Co-Toxin NAD-glycohydrolase Protect Group A Streptococcus from Xenophagic Killing
Source: PubMed Central journal article supplement (PMC3675196; doi:10.1371/journal.ppat.1003394), 2013-06-06
Supplement: ppat.1003394.s001.pdf [file ppat.1003394.s001.pdf]

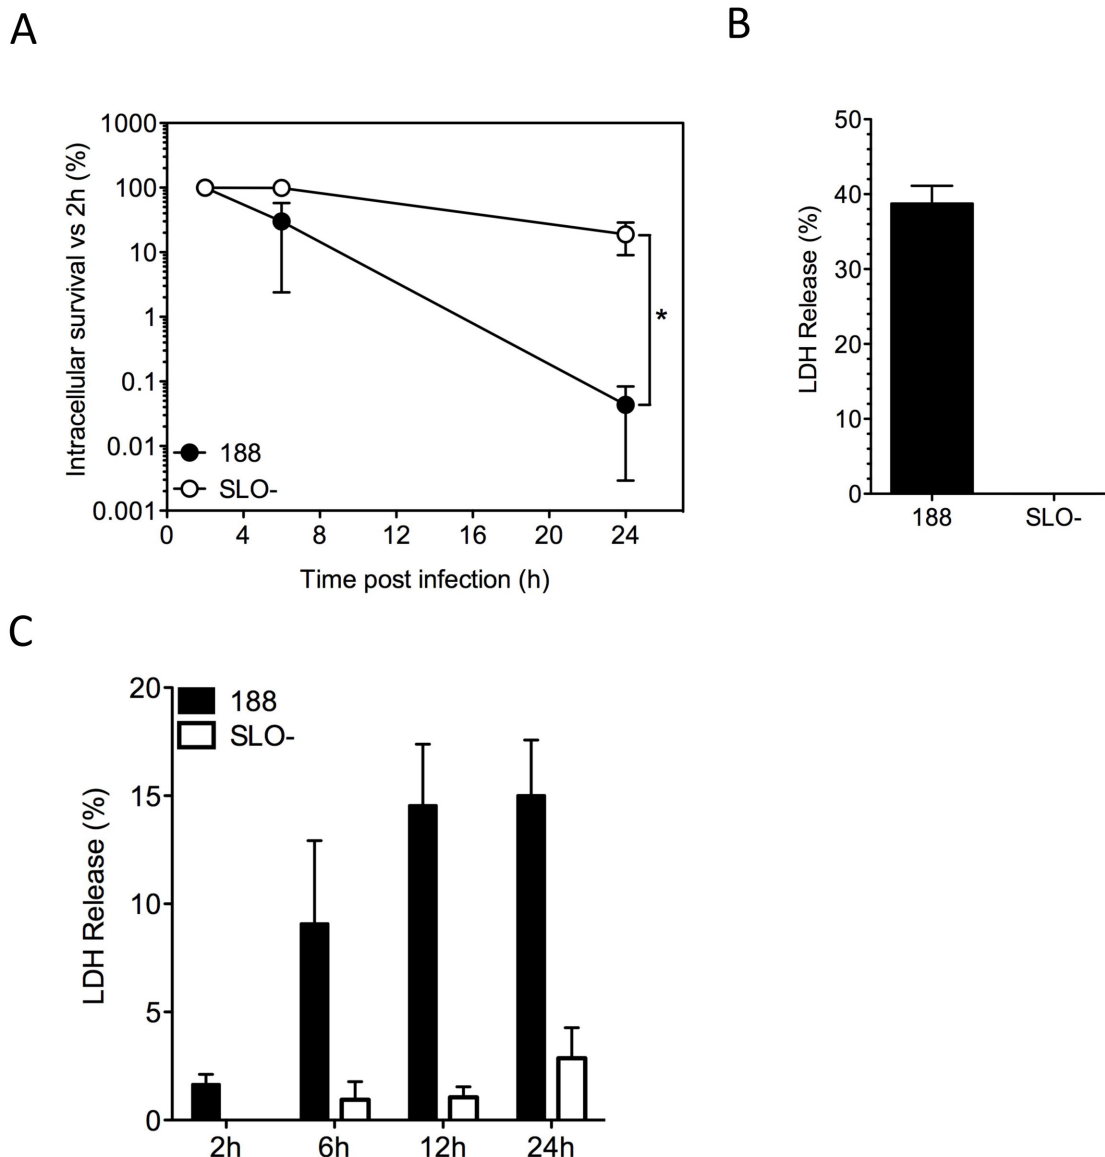

**Figure S1. Intracellular survival of GAS in HeLa cells and cytotoxic effects of GAS on HeLa and OKP7 cells.**

**A.** Intracellular survival in HeLa was determined as described above for strains 188 and 188SLO- (SLO-). Data represent mean $\pm$ SD of three independent experiments. \*,  $P < 0.001$ . **B.** LDH release was measured at 2h post-infection to determine cytotoxicity to HeLa cells due to GAS. **C.** LDH release from OKP7 cells infected with 188 and 188SLO- at 2h, 6h, 12h and 24h post-infection. Intracellular survival results were not considered reliable when LDH release exceeded 5% at 2h post-infection (i.e., for HeLa cells infected with strain 188).
