# Supplementary material for: Streptolysin O and its Co-Toxin NAD-glycohydrolase Protect Group A Streptococcus from Xenophagic Killing
Source: PLOS journal article supplement (doi:10.1371/journal.ppat.1003394), 2013-06-06
Supplement: S5 (10.1371/journal.ppat.1003394.s005) [file journal.ppat.1003394.s005]

**Table S1. GAS strains used in this study.**

| Strain             | Characteristics                                                                                                             | Source/reference |
|--------------------|-----------------------------------------------------------------------------------------------------------------------------|------------------|
| 950771 (771)       | Encapsulated necrotizing fasciitis isolate                                                                                  | [33]             |
| 771SLO-            | <i>slo</i> -negative deletion mutant of 771                                                                                 | [27]             |
| 771NADase-         | <i>nga</i> -negative deletion mutant of 771                                                                                 | [27]             |
| 771SLO(Y255A)      | Y255A point mutant of <i>slo</i> , deficient in pore formation but competent for NADase translocation by SLO                | This study       |
| 188                | Unencapsulated mutant of 950771                                                                                             | [33]             |
| 188SLO-            | <i>slo</i> -negative deletion mutant of 188                                                                                 | [47]             |
| 188NADase-         | <i>nga</i> -negative deletion mutant of 188                                                                                 | [14]             |
| 188SLS-            | <i>sagA</i> -negative deletion mutant of 188                                                                                | This study       |
| 188SLO-SLS-        | <i>slo</i> and <i>sagA</i> -negative deletion mutant of 188                                                                 | This study       |
| 188NADase(G330D)   | G330D point mutant of <i>nga</i> , lacking NAD-glycohydrolase activity, in strain 188                                       | This study       |
| 188SLO(Y255A)      | Y255A point mutant of <i>slo</i> , deficient in pore formation but competent for NADase translocation by SLO, in strain 188 | This study       |
| 188(pSIV)          | 188 containing <i>streptococcal</i> IPTG-inducible vector (pSIV). <i>Erm</i> <sup>R</sup>                                   | [15]             |
| 188SLO-(pSIV)      | 188SLO- containing pSIV. <i>Erm</i> <sup>R</sup>                                                                            | [15]             |
| 188SLO-(piSLO)     | 188SLO- containing IPTG-inducible SLO in pSIV. <i>Erm</i> <sup>R</sup>                                                      | [15]             |
| 188(pDL278)        | 188 containing empty pDL278 vector. <i>Spc</i> <sup>R</sup>                                                                 | This study       |
| 188NADase-(pDL278) | 188NADase- containing empty pDL278 vector. <i>Spc</i> <sup>R</sup>                                                          | This study       |
| 188(pSEC-IFS)      | 188 containing secreted IFS (SEC-IFS) under constitutive control of <i>PguaB</i> in pDL278. <i>Spc</i> <sup>R</sup>         | This study       |
| JRS4               | Derivative of the M6 strain D471 from the Rockefeller University collection                                                 | [44]             |
| JRS4SLO-           | <i>slo</i> -negative deletion mutant of JRS4 (SLO1)                                                                         | [43]             |
| JRS4NADase-        | <i>nga</i> -negative deletion mutant of JRS4 (SPN1)                                                                         | [28]             |

Abbreviations: *Erm*, erythromycin; *Spc*, spectinomycin.

\* Reference numbers refer to reference list of the article.
